# Supplementary material for: Tracing the accumulation of in vivo human oral microbiota elucidates microbial community dynamics at the gateway to the GI tract
Source: PubMed Central journal article supplement — Gut. 2019 Jun 20;69(7):1355–6. doi: 10.1136/gutjnl-2019-318977 (PMC7306975; doi:10.1136/gutjnl-2019-318977), 2019-06-20
Supplement: gutjnl-2019-318977supp001.pdf [file gutjnl-2019-318977supp001.pdf]

**Supplementary Figure S1. Paired saliva and dental plaque samples were collected from 9 subjects at 11 time points before and 3 months after scaling. NA denotes an incurred sample loss.**

**Supplementary Figure S2. Shannon diversity index showed the longitudinal fluctuation patterns of oral microbiota.**

**Supplementary Figure S3. Number of the significantly different genera of each time point compared to *pre* in dental plaque microbiota.**

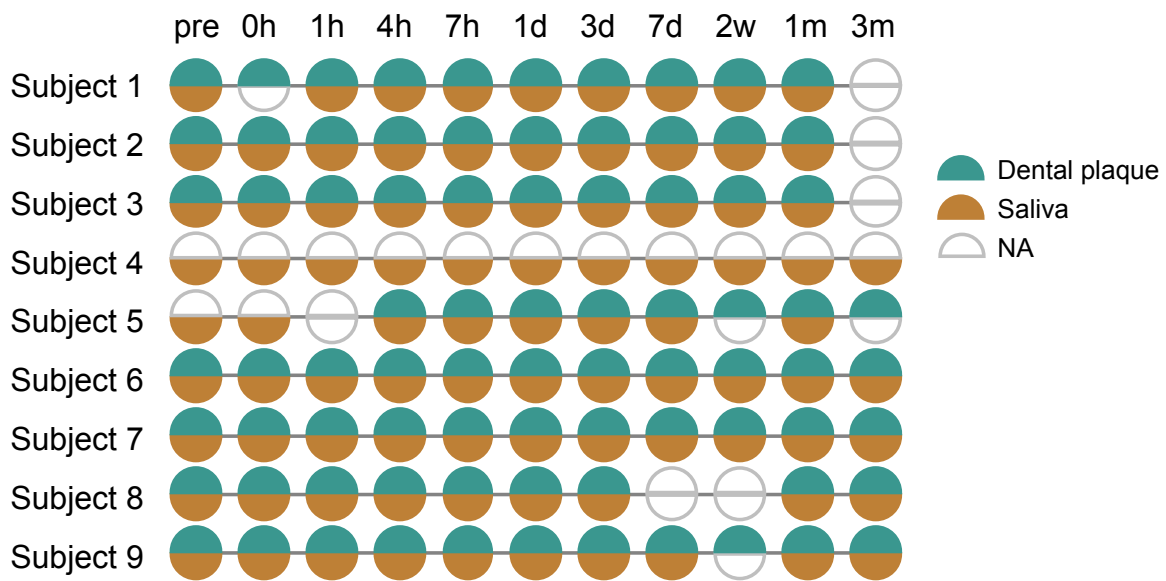

**Figure S1**

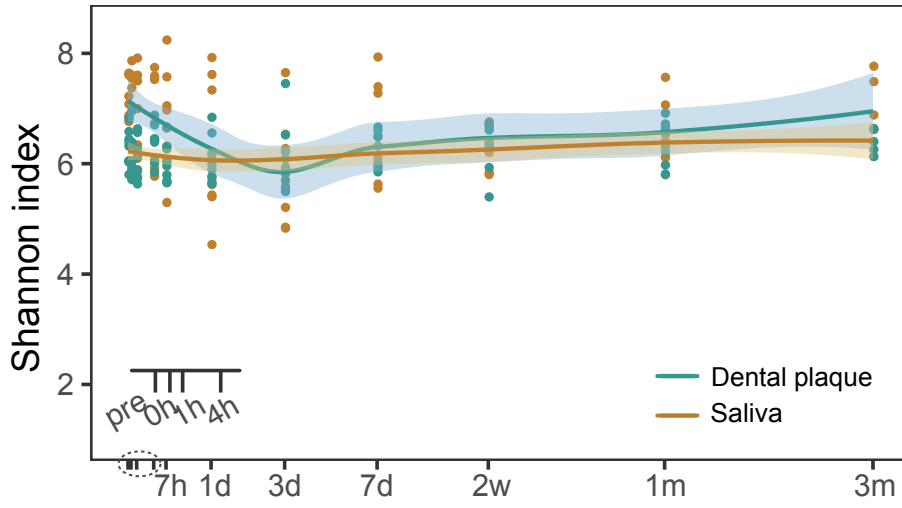

Figure S2

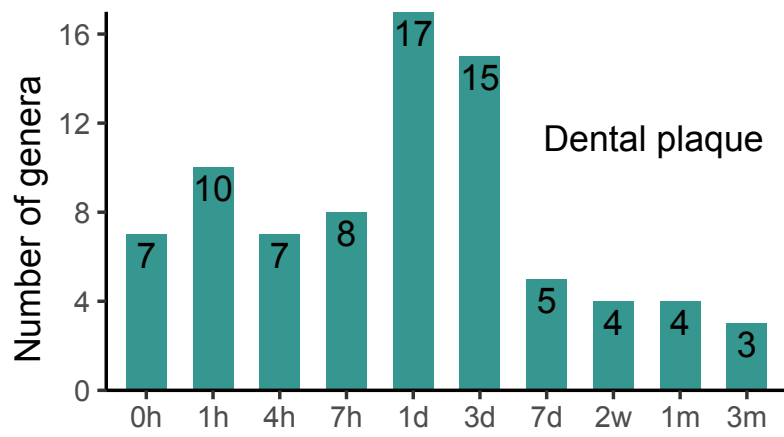

Figure S3
